# Supplementary material
Source: PubMed Central journal article supplement (PMC4469128)

# Supplementary Figure 1. EPI distortion due to the DBS electrode and Extension connector

(A) EPI distortion of the DBS electrode

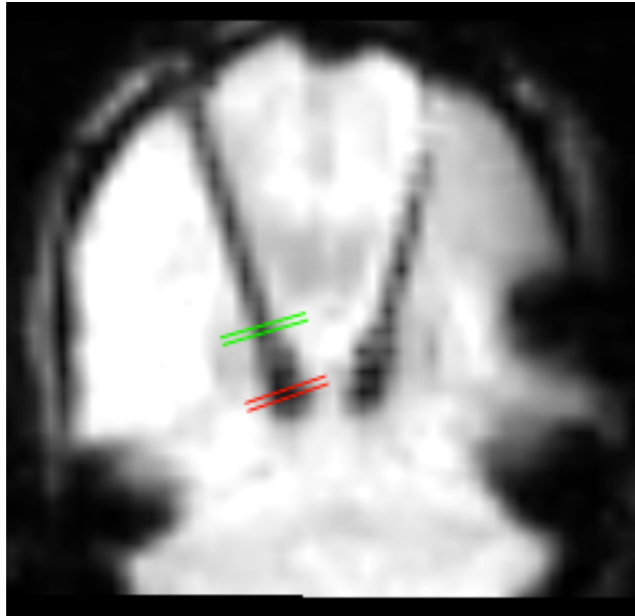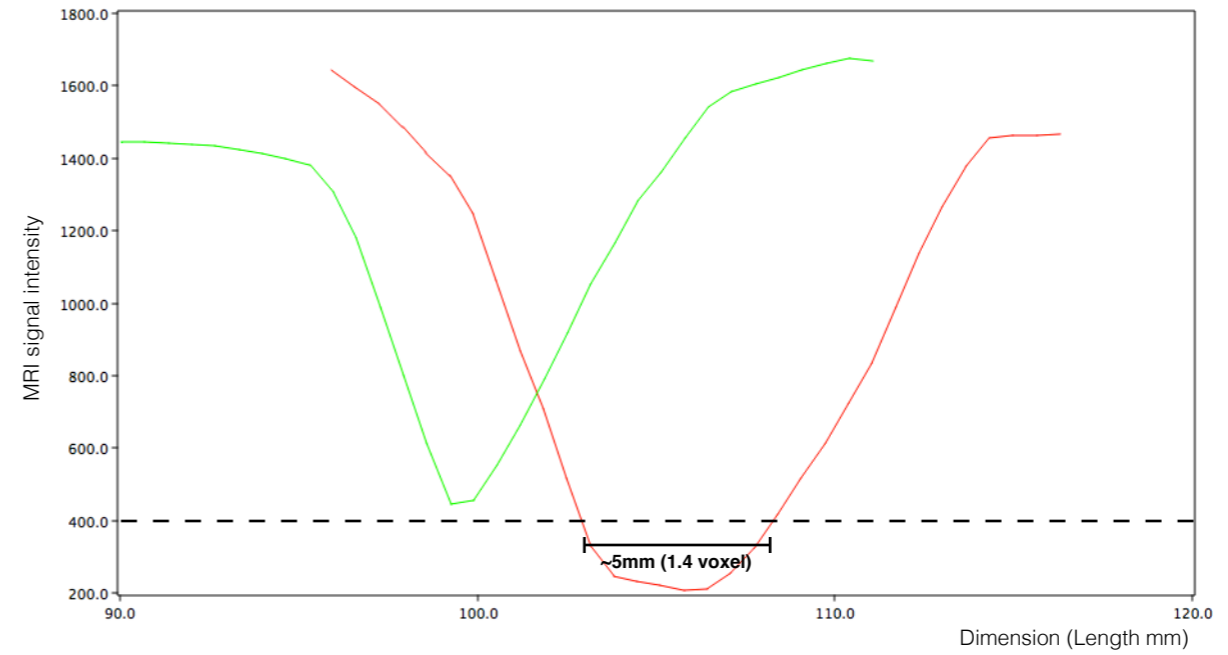

(B) EPI distortion of the Extension connector

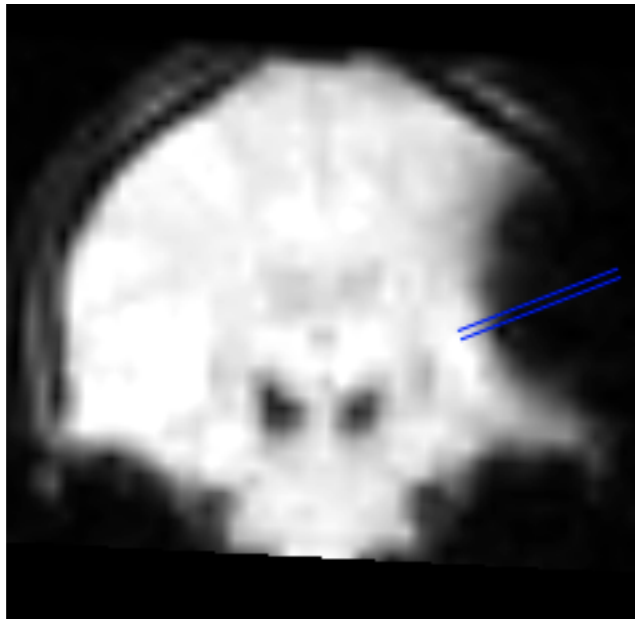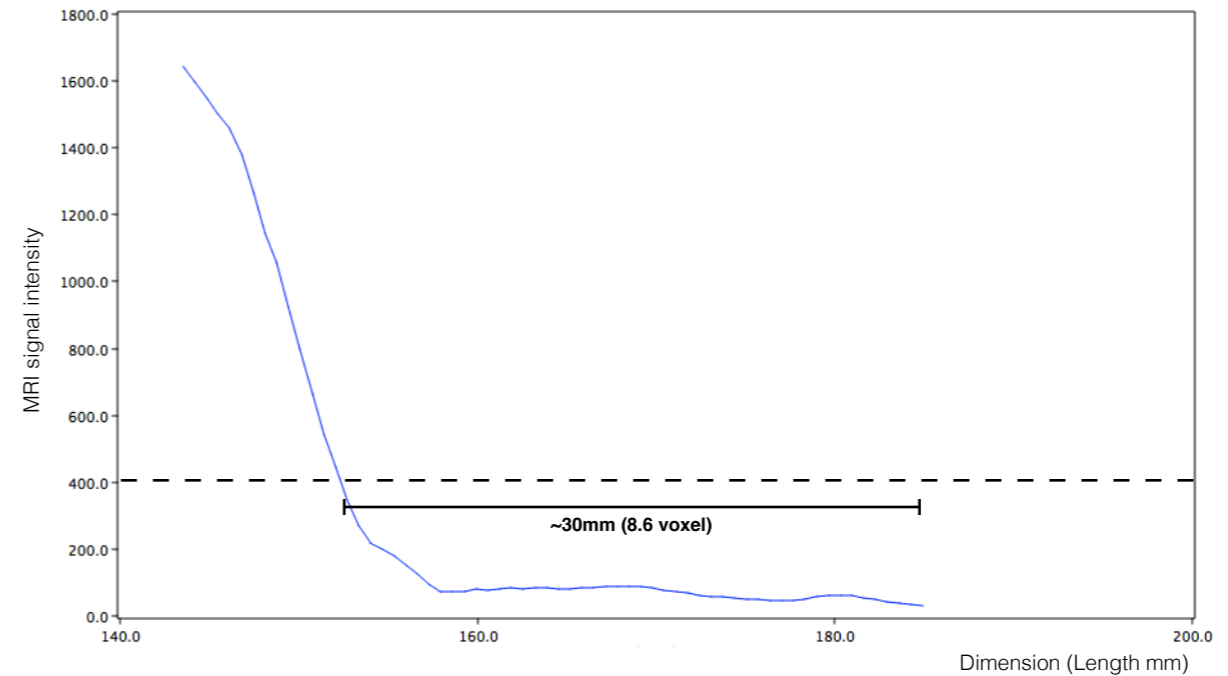

Supplement: NIHMS689121-supplement.pdf [file NIHMS689121-supplement.pdf]
